# Supplementary material
Source: publisher site journal article supplement (https://www.dovepress.com/article/580242)
Supplement: Supplementary file 1 [file 580242%20Supplementary%20Material.pdf]

# Supplementary

## Content

|                              |    |
|------------------------------|----|
| Supplementary Table 1 .....  | 2  |
| Supplementary Table 2 .....  | 4  |
| Supplementary Table 3 .....  | 5  |
| Supplementary Table 4 .....  | 6  |
| Supplementary Table 5 .....  | 9  |
| Supplementary Table 6 .....  | 10 |
| Supplementary Table 7 .....  | 11 |
| Supplementary Table 8 .....  | 12 |
| Supplementary Table 9 .....  | 13 |
| Supplementary Table 10 ..... | 14 |
| Supplementary Table 11 ..... | 17 |
| Supplementary Table 12 ..... | 18 |
| Supplementary Table 13 ..... | 20 |
| Supplementary Table 14 ..... | 21 |
| Supplementary Table 15 ..... | 21 |
| Supplementary Table 16 ..... | 22 |
| Supplementary Figure 1 ..... | 23 |
| Supplementary Figure 2 ..... | 24 |

**Supplementary Table 1: Individual patient data for the waterfall plot of radiotherapy response**

| ID | Response | Baseline Size(cm) | Post-RT Size(cm) | Change(%) |
|----|----------|-------------------|------------------|-----------|
| 1  | CR       | 0.6               | 0                | 100.0%    |
| 2  | PR       | 2.7               | 1.8              | 33.3%     |
| 3  | CR       | 1                 | 0                | 100.0%    |
| 4  | PD       | 5.5               | 8                | -45.5%    |
| 5  | PR       | 13                | 8.9              | 31.5%     |
| 6  | SD       | 4.5               | 4.6              | -2.2%     |
| 7  | PR       | 3.3               | 2.2              | 33.3%     |
| 8  | SD       | 1.8               | 1.9              | -5.6%     |
| 9  | PR       | 6                 | 4.1              | 31.7%     |
| 10 | PR       | 23.6              | 16.4             | 30.5%     |
| 11 | PR       | 8.2               | 5.2              | 36.6%     |
| 12 | PR       | 2.9               | 1.4              | 51.7%     |
| 13 | SD       | 2.9               | 2.9              | 0.0%      |
| 14 | SD       | 3                 | 2.9              | 3.3%      |
| 15 | PD       | 3.3               | 4.9              | -48.5%    |
| 16 | PD       | 2.2               | 3                | -36.4%    |
| 17 | SD       | 0.7               | 0.7              | 0.0%      |
| 18 | PR       | 1                 | 0.6              | 40.0%     |
| 19 | SD       | 3.1               | 2.9              | 6.5%      |
| 20 | SD       | 10.8              | 13.6             | -25.9%    |
| 21 | PR       | 3                 | 2.1              | 30.0%     |
| 22 | PR       | 2.5               | 1.5              | 40.0%     |
| 23 | SD       | 4.1               | 3.9              | 4.9%      |
| 24 | SD       | 3.4               | 3.5              | -2.9%     |
| 25 | PR       | 13.4              | 9.2              | 31.3%     |
| 26 | SD       | 3.8               | 3.7              | 2.6%      |
| 27 | PR       | 6.4               | 3.7              | 42.2%     |
| 28 | SD       | 3.4               | 3.4              | 0.0%      |
| 29 | PR       | 3.1               | 1.6              | 48.4%     |
| 30 | SD       | 5.3               | 5                | 5.7%      |
| 31 | SD       | 3.7               | 3.1              | 16.2%     |
| 32 | PD       | 0.7               | 1.2              | -71.4%    |
| 33 | PR       | 6.1               | 3.8              | 37.7%     |
| 34 | SD       | 3                 | 2.4              | 20.0%     |
| 35 | PR       | 7.5               | 3.9              | 48.0%     |
| 36 | PR       | 4.7               | 1.9              | 59.6%     |
| 37 | SD       | 9.1               | 7.7              | 15.4%     |
| 38 | SD       | 3.1               | 2.7              | 12.9%     |

|    |    |      |      |        |
|----|----|------|------|--------|
| 39 | SD | 5.4  | 4.5  | 16.7%  |
| 40 | PR | 10.3 | 6.7  | 35.0%  |
| 41 | PR | 4    | 2.4  | 40.0%  |
| 42 | CR | 0.5  | 0    | 100.0% |
| 43 | PR | 6.9  | 2.8  | 59.4%  |
| 44 | PR | 1.5  | 0.5  | 66.7%  |
| 45 | PR | 3    | 1.8  | 40.0%  |
| 46 | SD | 8.7  | 8    | 8.0%   |
| 47 | PR | 2.3  | 1.2  | 47.8%  |
| 48 | PR | 7.4  | 4.9  | 33.8%  |
| 49 | SD | 3    | 2.6  | 13.3%  |
| 50 | PD | 3.1  | 4.3  | -38.7% |
| 51 | PR | 15.5 | 10.4 | 32.9%  |
| 52 | SD | 4.6  | 5.7  | -23.9% |
| 53 | PR | 8.3  | 5.7  | 31.3%  |
| 54 | PD | 11.6 | 15.7 | -35.3% |
| 55 | PR | 3.7  | 2.1  | 43.2%  |
| 56 | SD | 7.2  | 8.3  | -15.3% |
| 57 | PR | 4.5  | 2.9  | 35.6%  |
| 58 | PR | 5.6  | 4.1  | 26.8%  |
| 59 | PR | 3    | 2    | 33.3%  |
| 60 | SD | 7.8  | 8.8  | -12.8% |
| 61 | PR | 3.6  | 2.4  | 33.3%  |

**Supplementary Table 2: Detailed parameters of the Sphingolipids-Only and Clinical-Only prediction models**

| Model                    | Variable                 | Beta    | Odds Ratio (OR) | 95% CI       | p-value |
|--------------------------|--------------------------|---------|-----------------|--------------|---------|
| Integrated Model         | S1P                      | 0.271   | 1.312           | 1.157-1.595  | 0.0006  |
| Integrated Model         | CER(d18:1/20:0)          | -0.016  | 0.984           | 0.969-0.995  | 0.0168  |
| Integrated Model         | ALP (high vs low)        | 1.64    | 5.156           | 0.986-35.197 | 0.0658  |
| Integrated Model         | TBIL (high vs low)       | 1.558   | 4.751           | 0.699-44.346 | 0.1291  |
| Integrated Model         | (Intercept)              | -12.583 | 0               | 0-0.002      | 0.0009  |
| Sphingolipids-Only Model | S1P                      | 0.24    | 1.271           | 1.142-1.48   | 0.0002  |
| Sphingolipids-Only Model | CER(d18:1/20:0)          | -0.014  | 0.986           | 0.972-0.995  | 0.0162  |
| Sphingolipids-Only Model | (Intercept)              | -10.212 | 0               | 0-0.0006     | 0.0006  |
| Clinical-Only Model      | ChildPugh_Score (A vs B) | 1.187   | 3.276           | 0.984-11.611 | 0.0563  |
| Clinical-Only Model      | AFP (high vs low)        | 1.142   | 3.132           | 0.97-10.582  | 0.0582  |
| Clinical-Only Model      | (Intercept)              | -0.964  | 0.381           | 0.173-0.78   | 0.0113  |

**Supplementary Table 3: Calibration data for the integrated clinical-sphingolipid model (Model 1)**

| Probability_Group | Predicted_Probability_Range | Actual_Probability |
|-------------------|-----------------------------|--------------------|
| [-0.001,0.1]      | [-0.001,0.1]                | 0.045454545        |
| (0.1,0.2]         | (0.1,0.2]                   | 0                  |
| (0.2,0.3]         | (0.2,0.3]                   | 1                  |
| (0.3,0.4]         | (0.3,0.4]                   | 0.25               |
| (0.4,0.5]         | (0.4,0.5]                   | 0                  |
| (0.5,0.6]         | (0.5,0.6]                   | 0.6                |
| (0.6,0.7]         | (0.6,0.7]                   | 0.5                |
| (0.7,0.8]         | (0.7,0.8]                   | 0.75               |
| (0.8,0.9]         | (0.8,0.9]                   | 1                  |
| (0.9,1]           | (0.9,1]                     | 1                  |

**Supplementary Table 4: Decision curve analysis data for the integrated clinical-sphingolipid model (Model 1)**

| Threshold | Multivariate_NetBenefit | S1P_Only_NetBenefit | AFP_Only_NetBenefit |
|-----------|-------------------------|---------------------|---------------------|
| 0         | 0.459                   | 0.459               | 0.459               |
| 0.01      | 0.4554                  | 0.4537              | 0.4536              |
| 0.02      | 0.4517                  | 0.4483              | 0.448               |
| 0.03      | 0.4315                  | 0.4438              | 0.4423              |
| 0.04      | 0.4296                  | 0.4385              | 0.4365              |
| 0.05      | 0.4271                  | 0.4357              | 0.4305              |
| 0.06      | 0.4269                  | 0.4308              | 0.4245              |
| 0.07      | 0.4241                  | 0.4282              | 0.4183              |
| 0.08      | 0.4227                  | 0.4248              | 0.412               |
| 0.09      | 0.4232                  | 0.4233              | 0.4055              |
| 0.1       | 0.4208                  | 0.4189              | 0.3989              |
| 0.11      | 0.4203                  | 0.398               | 0.3922              |
| 0.12      | 0.418                   | 0.3934              | 0.3852              |
| 0.13      | 0.4157                  | 0.3887              | 0.3782              |
| 0.14      | 0.4133                  | 0.3866              | 0.3709              |
| 0.15      | 0.4108                  | 0.3819              | 0.3635              |
| 0.16      | 0.4083                  | 0.3833              | 0.356               |
| 0.17      | 0.4057                  | 0.3855              | 0.3482              |
| 0.18      | 0.403                   | 0.3814              | 0.3403              |
| 0.19      | 0.4042                  | 0.3773              | 0.3321              |
| 0.2       | 0.4016                  | 0.3607              | 0.3238              |
| 0.21      | 0.399                   | 0.3609              | 0.3152              |
| 0.22      | 0.3964                  | 0.3569              | 0.3064              |
| 0.23      | 0.3773                  | 0.3364              | 0.2974              |
| 0.24      | 0.3745                  | 0.3374              | 0.2882              |
| 0.25      | 0.3716                  | 0.3333              | 0.2787              |
| 0.26      | 0.3686                  | 0.3292              | 0.2689              |
| 0.27      | 0.3656                  | 0.3249              | 0.2589              |
| 0.28      | 0.3625                  | 0.327               | 0.2486              |
| 0.29      | 0.3593                  | 0.3295              | 0.2381              |
| 0.3       | 0.356                   | 0.3091              | 0.2272              |
| 0.31      | 0.3526                  | 0.3124              | 0.216               |
| 0.32      | 0.3327                  | 0.3086              | 0.2044              |
| 0.33      | 0.3291                  | 0.3127              | 0.1926              |
| 0.34      | 0.3254                  | 0.2926              | 0.1868              |
| 0.35      | 0.3216                  | 0.2888              | 0.1841              |
| 0.36      | 0.3268                  | 0.2848              | 0.1814              |
| 0.37      | 0.3232                  | 0.2904              | 0.1785              |

---

|      |        |        |        |
|------|--------|--------|--------|
| 0.38 | 0.3295 | 0.2866 | 0.1756 |
| 0.39 | 0.3365 | 0.2663 | 0.1725 |
| 0.4  | 0.3333 | 0.2623 | 0.1694 |
| 0.41 | 0.3415 | 0.2417 | 0.1662 |
| 0.42 | 0.3386 | 0.2493 | 0.1628 |
| 0.43 | 0.3356 | 0.2453 | 0.1593 |
| 0.44 | 0.3454 | 0.2412 | 0.1557 |
| 0.45 | 0.3428 | 0.237  | 0.152  |
| 0.46 | 0.354  | 0.2325 | 0.1481 |
| 0.47 | 0.3517 | 0.2425 | 0.1441 |
| 0.48 | 0.3493 | 0.2383 | 0.14   |
| 0.49 | 0.3468 | 0.2498 | 0.1356 |
| 0.5  | 0.3443 | 0.2459 | 0.1311 |
| 0.51 | 0.3416 | 0.2419 | 0.1265 |
| 0.52 | 0.3388 | 0.2377 | 0.1216 |
| 0.53 | 0.3195 | 0.2333 | 0.1165 |
| 0.54 | 0.3165 | 0.2316 | 0.1112 |
| 0.55 | 0.3169 | 0.2113 | 0.1056 |
| 0.56 | 0.3145 | 0.1908 | 0.0999 |
| 0.57 | 0.3336 | 0.1864 | 0.0938 |
| 0.58 | 0.3318 | 0.1819 | 0.0874 |
| 0.59 | 0.3299 | 0.1771 | 0.0808 |
| 0.6  | 0.3115 | 0.1967 | 0.0738 |
| 0.61 | 0.3094 | 0.1761 | 0.0664 |
| 0.62 | 0.3339 | 0.1717 | 0.0587 |
| 0.63 | 0.3327 | 0.167  | 0.0505 |
| 0.64 | 0.3315 | 0.1621 | 0.0419 |
| 0.65 | 0.3302 | 0.171  | 0.0328 |
| 0.66 | 0.3124 | 0.1668 | 0.0231 |
| 0.67 | 0.311  | 0.1624 | 0.0129 |
| 0.68 | 0.3094 | 0.1578 | 0.002  |
| 0.69 | 0.3078 | 0.1528 | 0      |
| 0.7  | 0.306  | 0.1475 | 0      |
| 0.71 | 0.2877 | 0.1419 | 0      |
| 0.72 | 0.2857 | 0.1358 | 0      |
| 0.73 | 0.2835 | 0.2016 | 0      |
| 0.74 | 0.2812 | 0.1992 | 0      |
| 0.75 | 0.3279 | 0.1967 | 0      |
| 0.76 | 0.3279 | 0.194  | 0      |
| 0.77 | 0.3279 | 0.191  | 0      |
| 0.78 | 0.2951 | 0.1878 | 0      |
| 0.79 | 0.2951 | 0.1678 | 0      |
| 0.8  | 0.2951 | 0.1639 | 0      |

---

---

|      |        |        |    |
|------|--------|--------|----|
| 0.81 | 0.2951 | 0.1432 | 0  |
| 0.82 | 0.2951 | 0.2131 | 0  |
| 0.83 | 0.2787 | 0.1967 | 0  |
| 0.84 | 0.2623 | 0.1967 | 0  |
| 0.85 | 0.2623 | 0.1967 | 0  |
| 0.86 | 0.2623 | 0.1803 | 0  |
| 0.87 | 0.2623 | 0.1475 | 0  |
| 0.88 | 0.2295 | 0.1475 | 0  |
| 0.89 | 0.2295 | 0.1311 | 0  |
| 0.9  | 0.2295 | 0.1148 | 0  |
| 0.91 | 0.2295 | 0.1148 | 0  |
| 0.92 | 0.2295 | 0.082  | 0  |
| 0.93 | 0.2295 | 0.082  | 0  |
| 0.94 | 0.2295 | 0.0656 | 0  |
| 0.95 | 0.1967 | 0.0656 | 0  |
| 0.96 | 0.1639 | 0.0492 | 0  |
| 0.97 | 0.1475 | 0.0492 | 0  |
| 0.98 | 0.1311 | 0.0492 | 0  |
| 0.99 | 0.0984 | 0.0164 | 0  |
| 1    | NA     | NA     | NA |

---

**Supplementary Table 5: Comprehensive performance metrics of the integrated clinical-sphingolipid model (Model 1) across classification thresholds**

| Threshold | Accuracy | Sensitivity | Specificity | Precision | Recall | F1_Score |
|-----------|----------|-------------|-------------|-----------|--------|----------|
| 0.1       | 0.787    | 0.964       | 0.636       | 0.692     | 0.964  | 0.806    |
| 0.2       | 0.82     | 0.964       | 0.697       | 0.73      | 0.964  | 0.831    |
| 0.3       | 0.803    | 0.929       | 0.697       | 0.722     | 0.929  | 0.813    |
| 0.4       | 0.836    | 0.893       | 0.788       | 0.781     | 0.893  | 0.833    |
| 0.5       | 0.885    | 0.893       | 0.879       | 0.862     | 0.893  | 0.877    |
| 0.6       | 0.869    | 0.786       | 0.939       | 0.917     | 0.786  | 0.846    |
| 0.7       | 0.869    | 0.75        | 0.97        | 0.955     | 0.75   | 0.84     |
| 0.8       | 0.836    | 0.643       | 1           | 1         | 0.643  | 0.783    |
| 0.9       | 0.77     | 0.5         | 1           | 1         | 0.5    | 0.667    |

**Supplementary Table 6: Baseline plasma CER/S1P ratio profiles of hepatocellular carcinoma patients stratified by radiotherapy response**

| <b>Plasma Sphingolipids</b> | <b>Total (n = 61)</b> | <b>Responders (n = 33)</b> | <b>Non-responders (n = 28)</b> | <b>P value</b> | <b>FDR-adjusted P value</b> |
|-----------------------------|-----------------------|----------------------------|--------------------------------|----------------|-----------------------------|
| CER(d18:1/16:0)/S1P         | 4.25(3.34;6.52)       | 5.10(3.98;7.75)            | 3.53(2.77;4.32)                | 1.5E-4***      | 6.00E-04***                 |
| CER(d18:1/18:0)/S1P         | 1.51(0.99;2.32)       | 1.98(1.25;2.96)            | 1.19(0.73;1.67)                | 2.7E-4***      | 6.00E-04***                 |
| CER(d18:1/20:0)/S1P         | 3.34(2.26;4.84)       | 4.47(3.07;5.93)            | 2.73(1.70;3.42)                | 3.5E-5***      | 4.20E-04***                 |
| CER(d18:1/22:0)/S1P         | 50.43(32.13;71.54)    | 67.96(45.43;84.45)         | 35.79(29.85;51.67)             | 1.7E-4***      | 6.00E-04***                 |
| CER(d18:1/24:0)/S1P         | 188.64(119.78;271.30) | 232.48(156.14;331.02)      | 137.97(108.91;193.72)          | 1.4E-3**       | 1.53E-03**                  |
| CER(d18:1/26:0)/S1P         | 1.49(1.21;2.09)       | 1.99(1.33;2.72)            | 1.30(1.02;1.78)                | 1.2E-3**       | 1.44E-03**                  |
| CER(d18:1/18:1)/S1P         | 0.08(0.05;0.12)       | 0.11(0.06;0.14)            | 0.06(0.04;0.09)                | 2.4E-3**       | 2.40E-03**                  |
| CER(d18:1/20:1)/S1P         | 0.29(0.22;0.36)       | 0.33(0.28;0.45)            | 0.25(0.19;0.32)                | 9.3E-5***      | 5.58E-04***                 |
| CER(d18:1/22:1)/S1P         | 0.41(0.34;0.56)       | 0.49(0.39;0.69)            | 0.34(0.29;0.43)                | 1.8E-4***      | 6.00E-04***                 |
| CER(d18:1/24:1)/S1P         | 28.09(18.56;44.76)    | 36.65(23.26;57.70)         | 22.03(13.35;28.36)             | 3.3E-4***      | 6.00E-04***                 |
| CER(d18:1/26:1)/S1P         | 0.85(0.61;1.23)       | 1.09(0.82;1.70)            | 0.68(0.54;0.92)                | 6.0E-4***      | 8.00E-04***                 |
| Total CERs(d18:1)/S1P       | 274.64(188.94;410.55) | 391.24(256.67;496.17)      | 206.79(178.94;271.50)          | 1.9E-4***      | 6.00E-04***                 |

\*\*P < 0.01, \*\*\*P < 0.001(Mann-Whitney U test)

**Supplementary Table 7: Analysis of covariance (ANCOVA) results for CER/S1P ratio variables controlling for S1P concentration**

| Variable            | Responders_Mean | NonResponders_Mean | F_value | P_value | FDR_adjusted_P | FDR<0.1 |
|---------------------|-----------------|--------------------|---------|---------|----------------|---------|
| CER(d18:1/16:0)/S1P | 3.761           | 6.821              | 1.428   | 0.2369  | 0.2584         | NS      |
| CER(d18:1/18:0)/S1P | 1.3639          | 2.9286             | 0.807   | 0.3726  | 0.3726         | NS      |
| CER(d18:1/20:0)/S1P | 2.7231          | 5.7015             | 1.605   | 0.2103  | 0.2584         | NS      |
| CER(d18:1/22:0)/S1P | 39.5798         | 68.5381            | 5.792   | 0.0193  | 0.0547         | †       |
| CER(d18:1/24:0)/S1P | 156.078         | 244.8308           | 10.228  | 0.0022  | 0.0144         | †       |
| CER(d18:1/26:0)/S1P | 1.3571          | 2.0004             | 9.13    | 0.0037  | 0.0150         | †       |
| CER(d18:1/18:1)/S1P | 0.0665          | 0.1137             | 4.51    | 0.0380  | 0.0759         | †       |
| CER(d18:1/20:1)/S1P | 0.2508          | 0.4015             | 1.542   | 0.2193  | 0.2584         | NS      |
| CER(d18:1/22:1)/S1P | 0.3601          | 0.6373             | 2.114   | 0.1513  | 0.2270         | NS      |
| CER(d18:1/24:1)/S1P | 22.9299         | 45.2079            | 2.158   | 0.1472  | 0.2270         | NS      |
| CER(d18:1/26:1)/S1P | 0.7381          | 1.2459             | 5.472   | 0.0228  | 0.0547         | †       |
| Total               |                 |                    |         |         |                |         |
| CERs(d18:1)/S1P     | 229.2082        | 378.4267           | 10.077  | 0.0024  | 0.0144         | †       |

†, FDR-adjusted P value < 0.1; NS, not significant.

**Supplementary Table 8: Final variable selection by LASSO regression for the ceramide/S1P ratio-based model**

| Variable               | Coefficient | Selected |
|------------------------|-------------|----------|
| (Intercept)            | 0.5314      | Yes      |
| AFP                    | 0           | No       |
| TBIL                   | 0           | No       |
| Child Pugh Score       | 0           | No       |
| ALP                    | 0           | No       |
| CER(d18:1/22:0) /S1P   | 0           | No       |
| CER(d18:1/24:0) /S1P   | 0           | No       |
| CER(d18:1/26:0) /S1P   | 0           | No       |
| CER(d18:1/18:1) /S1P   | 0           | No       |
| CER(d18:1/26:1) /S1P   | -0.2052     | Yes      |
| Total CERs(d18:1) /S1P | -0.0016     | Yes      |

**Supplementary Table 9: Calibration data for the ceramide/S1P ratio-based model (Model 2)**

| Probability_Group | Predicted_Probability_Range | Actual_Probability |
|-------------------|-----------------------------|--------------------|
| [0.0045,0.101]    | [0.0045,0.101]              | 0                  |
| (0.101,0.197]     | (0.101,0.197]               | 0                  |
| (0.197,0.293]     | (0.197,0.293]               | 0.167              |
| (0.293,0.389]     | (0.293,0.389]               | 0.667              |
| (0.389,0.485]     | (0.389,0.485]               | 1                  |
| (0.485,0.581]     | (0.485,0.581]               | 0.625              |
| (0.581,0.677]     | (0.581,0.677]               | 0.778              |
| (0.677,0.773]     | (0.677,0.773]               | 0.667              |
| (0.773,0.868]     | (0.773,0.868]               | 0.5                |
| (0.868,0.965]     | (0.868,0.965]               | 0.857              |

**Supplementary Table 10: Decision curve analysis data for the ceramide/S1P ratio-based model (Model 2)**

| Threshold | Model2_NetBenefit | Sphingolipid_Only_NetBenefit | AFP_Only_NetBenefit |
|-----------|-------------------|------------------------------|---------------------|
| 0         | 0.459             | 0.459                        | 0.459               |
| 0.01      | 0.4539            | 0.4536                       | 0.4536              |
| 0.02      | 0.4493            | 0.4483                       | 0.448               |
| 0.03      | 0.4443            | 0.4428                       | 0.4423              |
| 0.04      | 0.4406            | 0.4378                       | 0.4365              |
| 0.05      | 0.4366            | 0.434                        | 0.4305              |
| 0.06      | 0.4329            | 0.4297                       | 0.4245              |
| 0.07      | 0.4294            | 0.4257                       | 0.4183              |
| 0.08      | 0.4262            | 0.4205                       | 0.412               |
| 0.09      | 0.4217            | 0.4152                       | 0.4055              |
| 0.1       | 0.4189            | 0.4098                       | 0.3989              |
| 0.11      | 0.4165            | 0.3899                       | 0.3922              |
| 0.12      | 0.4121            | 0.3845                       | 0.3852              |
| 0.13      | 0.4076            | 0.3838                       | 0.3782              |
| 0.14      | 0.4083            | 0.3839                       | 0.3709              |
| 0.15      | 0.4041            | 0.379                        | 0.3635              |
| 0.16      | 0.4028            | 0.3739                       | 0.356               |
| 0.17      | 0.3986            | 0.3688                       | 0.3482              |
| 0.18      | 0.3978            | 0.3635                       | 0.3403              |
| 0.19      | 0.3975            | 0.358                        | 0.3321              |
| 0.2       | 0.3934            | 0.3525                       | 0.3238              |
| 0.21      | 0.3937            | 0.3511                       | 0.3152              |
| 0.22      | 0.3943            | 0.3455                       | 0.3064              |
| 0.23      | 0.3954            | 0.3398                       | 0.2974              |
| 0.24      | 0.3753            | 0.3391                       | 0.2882              |
| 0.25      | 0.3716            | 0.3333                       | 0.2787              |
| 0.26      | 0.3677            | 0.311                        | 0.2689              |
| 0.27      | 0.3759            | 0.305                        | 0.2589              |
| 0.28      | 0.3725            | 0.2987                       | 0.2486              |
| 0.29      | 0.369             | 0.2923                       | 0.2381              |
| 0.3       | 0.3653            | 0.2857                       | 0.2272              |

|      |         |        |        |
|------|---------|--------|--------|
| 0.31 | 0.3452  | 0.2789 | 0.216  |
| 0.32 | 0.3414  | 0.2719 | 0.2044 |
| 0.33 | 0.3374  | 0.2647 | 0.1926 |
| 0.34 | 0.3169  | 0.2573 | 0.1868 |
| 0.35 | 0.3216  | 0.2585 | 0.1841 |
| 0.36 | 0.3176  | 0.2439 | 0.1814 |
| 0.37 | 0.3136  | 0.2201 | 0.1785 |
| 0.38 | 0.3094  | 0.2327 | 0.1756 |
| 0.39 | 0.305   | 0.2094 | 0.1725 |
| 0.4  | 0.3005  | 0.2131 | 0.1694 |
| 0.41 | 0.2959  | 0.2062 | 0.1662 |
| 0.42 | 0.2911  | 0.199  | 0.1628 |
| 0.43 | 0.2698  | 0.1915 | 0.1593 |
| 0.44 | 0.2646  | 0.2096 | 0.1557 |
| 0.45 | 0.2593  | 0.2027 | 0.152  |
| 0.46 | 0.2538  | 0.1791 | 0.1481 |
| 0.47 | 0.2317  | 0.1698 | 0.1441 |
| 0.48 | 0.2257  | 0.1627 | 0.14   |
| 0.49 | 0.2353  | 0.1389 | 0.1356 |
| 0.5  | 0.2459  | 0.1311 | 0.1311 |
| 0.51 | 0.2405  | 0.1402 | 0.1265 |
| 0.52 | 0.235   | 0.1339 | 0.1216 |
| 0.53 | 0.1964  | 0.1636 | 0.1165 |
| 0.54 | 0.1903  | 0.1768 | 0.1112 |
| 0.55 | 0.184   | 0.1712 | 0.1056 |
| 0.56 | 0.1446  | 0.1654 | 0.0999 |
| 0.57 | 0.1376  | 0.1266 | 0.0938 |
| 0.58 | 0.114   | 0.1038 | 0.0874 |
| 0.59 | 0.0972  | 0.0972 | 0.0808 |
| 0.6  | 0.0902  | 0.0738 | 0.0738 |
| 0.61 | 0.0664  | 0.05   | 0.0664 |
| 0.62 | 0.0854  | 0.0259 | 0.0587 |
| 0.63 | 0.0899  | 0.0292 | 0.0505 |
| 0.64 | 0.0838  | 0.0055 | 0.0419 |
| 0.65 | 0.0773  | 0.0117 | 0.0328 |
| 0.66 | 0.0704  | 0.0203 | 0.0231 |
| 0.67 | 0.0139  | 0.0149 | 0.0129 |
| 0.68 | 0.041   | 0.0451 | 0.002  |
| 0.69 | 0.0344  | 0.0418 | 0      |
| 0.7  | 0.0109  | 0.0219 | 0      |
| 0.71 | 0.0034  | 0.0181 | 0      |
| 0.72 | -0.0047 | 0.0562 | 0      |
| 0.73 | -0.0134 | 0.054  | 0      |

|      |         |         |    |
|------|---------|---------|----|
| 0.74 | -0.0227 | 0.0353  | 0  |
| 0.75 | -0.0492 | 0.0328  | 0  |
| 0.76 | -0.0601 | 0.0137  | 0  |
| 0.77 | -0.072  | -0.0221 | 0  |
| 0.78 | -0.0849 | 0.0328  | 0  |
| 0.79 | -0.0375 | 0.0328  | 0  |
| 0.8  | -0.0492 | 0.0164  | 0  |
| 0.81 | 0.0078  | 0.0164  | 0  |
| 0.82 | -0.0018 | 0.0164  | 0  |
| 0.83 | -0.0289 | 0       | 0  |
| 0.84 | 0.0451  | 0       | 0  |
| 0.85 | 0.0219  | 0       | 0  |
| 0.86 | -0.0023 | 0       | 0  |
| 0.87 | -0.0113 | 0       | 0  |
| 0.88 | 0.0984  | 0       | 0  |
| 0.89 | 0.082   | 0       | 0  |
| 0.9  | 0.0492  | 0       | 0  |
| 0.91 | 0.0492  | 0       | 0  |
| 0.92 | 0.0328  | 0       | 0  |
| 0.93 | 0.0328  | 0       | 0  |
| 0.94 | 0.0328  | 0       | 0  |
| 0.95 | 0.0164  | 0       | 0  |
| 0.96 | 0.0164  | 0       | 0  |
| 0.97 | 0       | 0       | 0  |
| 0.98 | 0       | 0       | 0  |
| 0.99 | 0       | 0       | 0  |
| 1    | NA      | NA      | NA |

---

**Supplementary Table 11: Comprehensive performance metrics of the ceramide/S1P ratio-based model (Model 2) across classification thresholds**

| Threshold | Accuracy | Sensitivity | Specificity | Precision | F1_Score |
|-----------|----------|-------------|-------------|-----------|----------|
| 0.1       | 0.639    | 1           | 0.333       | 0.56      | 0.718    |
| 0.2       | 0.738    | 1           | 0.515       | 0.636     | 0.778    |
| 0.3       | 0.803    | 0.964       | 0.667       | 0.711     | 0.818    |
| 0.4       | 0.787    | 0.893       | 0.697       | 0.714     | 0.794    |
| 0.5       | 0.787    | 0.821       | 0.758       | 0.742     | 0.78     |
| 0.6       | 0.689    | 0.571       | 0.788       | 0.696     | 0.627    |
| 0.7       | 0.639    | 0.357       | 0.879       | 0.714     | 0.476    |
| 0.8       | 0.639    | 0.321       | 0.909       | 0.75      | 0.45     |
| 0.9       | 0.59     | 0.107       | 1           | 1         | 0.194    |

**Supplementary Table 12: Sphingolipid fold change data for the longitudinal analysis heatmap**

| num<br>ber | ID | outc<br>ome | SPH(Lo<br>g2FC) | S1P(Lo<br>g2FC) | CER(d1<br>8:1/16:<br>0) | CER(d1<br>8:1/18:<br>0) | CER(d1<br>8:1/20:<br>0) | CER(d1<br>8:1/22:<br>0) | CER(d1<br>8:1/24:<br>0) | CER(d1<br>8:1/26:<br>0) | CER(d<br>18:1/1<br>8:1) | CER(d<br>18:1/2<br>0:1) | CER(d<br>18:1/2<br>2:1) | CER(d<br>18:1/2<br>4:1) | CER(d<br>18:1/2<br>6:1) | Total CE<br>R(d18:1) |
|------------|----|-------------|-----------------|-----------------|-------------------------|-------------------------|-------------------------|-------------------------|-------------------------|-------------------------|-------------------------|-------------------------|-------------------------|-------------------------|-------------------------|----------------------|
| 1          | 5  | 1           | 0.407           | 0.073           | 0.526                   | 0.804                   | 0.146                   | -0.417                  | -1.107                  | -0.386                  | -0.361                  | -0.541                  | -0.326                  | -0.317                  | -0.052                  | -0.724               |
| 2          | 6  | 0           | 0.164           | 0.041           | -0.021                  | 0.303                   | 0.394                   | 0.187                   | 0.545                   | 1.183                   | 0.320                   | 0.193                   | 0.284                   | 0.383                   | 0.765                   | 0.461                |
| 3          | 8  | 1           | 0.240           | 0.005           | -0.281                  | -0.785                  | -0.405                  | -0.327                  | -0.042                  | -0.063                  | -1.826                  | -0.926                  | -0.805                  | -1.176                  | -0.695                  | -0.195               |
| 4          | 10 | 1           | 0.378           | 0.186           | -0.533                  | -0.996                  | -0.761                  | -0.713                  | -0.661                  | -0.749                  | -0.734                  | -0.164                  | -0.321                  | -1.132                  | -0.668                  | -0.715               |
| 5          | 11 | 0           | 0.050           | -0.184          | 0.228                   | -0.072                  | -0.047                  | 0.245                   | 0.189                   | -0.160                  | -0.277                  | 0.048                   | 0.077                   | -0.198                  | -0.430                  | 0.152                |
| 6          | 12 | 0           | -0.094          | -0.625          | 0.455                   | -0.072                  | 0.310                   | 0.915                   | 1.501                   | 1.589                   | -0.002                  | -0.029                  | 0.256                   | 0.309                   | 0.434                   | 1.041                |
| 7          | 13 | 0           | -0.737          | 0.089           | 0.392                   | 0.484                   | 0.824                   | 1.112                   | 1.051                   | 0.658                   | 0.954                   | 0.275                   | 0.535                   | 0.204                   | 0.086                   | 0.913                |
| 8          | 18 | 1           | 0.810           | 0.235           | -0.170                  | 0.167                   | -0.612                  | -2.180                  | -2.530                  | -1.490                  | 0.452                   | -0.028                  | -0.514                  | 0.045                   | 0.503                   | -2.060               |
| 9          | 23 | 1           | -0.248          | 0.632           | 0.360                   | -0.093                  | -0.335                  | -1.119                  | -1.519                  | -1.184                  | -0.083                  | -0.177                  | -0.470                  | -0.627                  | -0.600                  | -1.312               |
| 10         | 27 | 0           | 0.037           | -0.114          | 0.079                   | 0.482                   | 0.175                   | -0.212                  | -0.098                  | 0.141                   | 0.343                   | 0.146                   | 0.018                   | 0.081                   | 0.293                   | -0.092               |
| 11         | 30 | 0           | -0.316          | -0.235          | 0.178                   | 0.035                   | 0.003                   | 0.487                   | 0.796                   | 0.571                   | -0.838                  | -0.328                  | -0.288                  | -0.291                  | 0.234                   | 0.595                |
| 12         | 31 | 0           | -0.077          | -0.171          | -0.334                  | 0.793                   | 0.927                   | 1.168                   | 1.034                   | 0.622                   | 0.745                   | 0.595                   | 0.627                   | 1.006                   | 0.519                   | 0.993                |
| 13         | 41 | 1           | 2.447           | 0.452           | 2.287                   | 3.530                   | 2.677                   | 1.411                   | 0.275                   | -0.015                  | 2.672                   | 0.806                   | 1.192                   | 1.603                   | 1.173                   | 0.977                |
| 14         | 48 | 1           | 0.129           | -0.450          | -0.462                  | -0.432                  | -0.385                  | -0.091                  | -0.290                  | -0.567                  | 0.042                   | -0.140                  | -0.222                  | -1.413                  | -1.452                  | -0.493               |
| 15         | 51 | 0           | -0.787          | -0.788          | -1.024                  | -1.656                  | -1.757                  | -1.743                  | -2.019                  | -0.341                  | -1.198                  | -0.597                  | -0.779                  | -1.763                  | -1.926                  | -1.868               |
| 16         | 53 | 0           | -0.669          | -0.184          | 0.225                   | 0.140                   | 0.359                   | 0.596                   | 0.681                   | 0.146                   | -0.451                  | -0.309                  | 0.003                   | 0.319                   | 0.329                   | 0.606                |
| 17         | 58 | 0           | 0.725           | 0.469           | -0.440                  | -0.895                  | -0.904                  | -0.359                  | 0.504                   | 1.045                   | -2.126                  | -0.272                  | -0.361                  | -0.871                  | 0.304                   | 0.160                |
| 18         | 66 | 0           | -0.481          | -0.861          | 0.343                   | 0.663                   | 0.114                   | -0.331                  | -0.378                  | -0.215                  | 0.856                   | 0.036                   | -0.119                  | -0.149                  | -0.211                  | -0.307               |

|    |    |   |        |        |        |        |        |        |        |        |        |        |        |        |       |        |
|----|----|---|--------|--------|--------|--------|--------|--------|--------|--------|--------|--------|--------|--------|-------|--------|
| 19 | 73 | 0 | -0.098 | 0.057  | 0.293  | 0.420  | 0.537  | 0.855  | 0.824  | 0.870  | 0.859  | 0.599  | 0.704  | 0.698  | 0.701 | 0.803  |
| 20 | 78 | 0 | -0.640 | -0.250 | -0.186 | -0.497 | -0.632 | -0.867 | -0.731 | -0.346 | 0.634  | -0.046 | -0.111 | -0.415 | 0.206 | -0.649 |
| 21 | 81 | 1 | 1.339  | 0.573  | 0.027  | -0.254 | -0.590 | -0.421 | -0.320 | -0.113 | 0.073  | 0.026  | -0.040 | -0.872 | 0.045 | -0.392 |
| 22 | 82 | 0 | -0.582 | -0.719 | 0.713  | 1.047  | 0.781  | 0.637  | -0.084 | -0.330 | 0.502  | 0.029  | 0.000  | 0.640  | 0.445 | 0.171  |
| 23 | 84 | 0 | 1.798  | 0.148  | 0.247  | 0.691  | 0.028  | -0.749 | -0.973 | -0.335 | 0.796  | 0.036  | -0.177 | 0.648  | 0.814 | -0.752 |
| 24 | 88 | 0 | -0.200 | 0.040  | -0.129 | 0.085  | 0.278  | 0.276  | 0.275  | 0.226  | -0.476 | -0.220 | 0.093  | 0.042  | 0.005 | 0.221  |
| 25 | 91 | 0 | -0.376 | -0.171 | 0.287  | 0.460  | 0.669  | 0.111  | 0.030  | 0.351  | -0.605 | 0.250  | 0.321  | 0.247  | 0.463 | 0.076  |

**Supplementary Table 13: PLS-DA score data for the longitudinal analysis of sphingolipid dynamics**

| Patient | Outcome      | Comp1    | Comp2    |
|---------|--------------|----------|----------|
| P 1     | NonResponder | -1.78208 | -1.01977 |
| P 2     | Responder    | 1.789021 | 0.24182  |
| P 3     | NonResponder | -1.47993 | 1.3344   |
| P 4     | NonResponder | -2.14659 | 0.529044 |
| P 5     | Responder    | 0.209066 | 0.152065 |
| P 6     | Responder    | 3.313324 | 1.490849 |
| P 7     | Responder    | 2.314084 | -0.37204 |
| P 8     | NonResponder | -3.93513 | -1.03413 |
| P 9     | NonResponder | -3.24906 | -1.12757 |
| P 10    | Responder    | 0.338542 | -0.00253 |
| P 11    | Responder    | 1.236138 | 1.216635 |
| P 12    | Responder    | 2.921662 | -0.07915 |
| P 13    | NonResponder | 0.835329 | -7.66621 |
| P 14    | NonResponder | -1.17851 | 0.924503 |
| P 15    | Responder    | -2.5826  | 4.277216 |
| P 16    | Responder    | 1.442342 | 0.81834  |
| P 17    | Responder    | -0.24743 | 1.239949 |
| P 18    | Responder    | 0.456763 | 0.91212  |
| P 19    | Responder    | 2.51668  | -0.45142 |
| P 20    | Responder    | -0.47712 | 1.376103 |
| P 21    | NonResponder | -1.83493 | -1.46425 |
| P 22    | Responder    | 1.35183  | 0.072073 |
| P 23    | Responder    | -1.65076 | -2.06602 |
| P 24    | Responder    | 0.606548 | 0.427597 |
| P 25    | Responder    | 1.23281  | 0.27037  |

**Supplementary Table 14: Variable Importance in Projection (VIP) scores from the PLS-DA model**

| Lipid            | VIP Score |
|------------------|-----------|
| CER(d18:1/26:0)  | 1.45792   |
| SPH              | 1.408646  |
| S1P              | 1.375921  |
| CER(d18:1/24:0)  | 1.172296  |
| Total CER(d18:1) | 1.121335  |
| CER(d18:1/22:0)  | 1.013501  |
| CER(d18:1/16:0)  | 0.849414  |
| CER(d18:1/22:1)  | 0.834315  |
| CER(d18:1/20:0)  | 0.831788  |
| CER(d18:1/24:1)  | 0.805425  |
| CER(d18:1/18:0)  | 0.736174  |
| CER(d18:1/26:1)  | 0.663893  |
| CER(d18:1/20:1)  | 0.599732  |
| CER(d18:1/18:1)  | 0.487467  |

**Supplementary Table 15: Statistical data for post-radiotherapy fold changes of key sphingolipids between responders and non-responders**

| Lipid            | n(Responder) | n(Non-Responder) | statistic | df     | p     | FDR-adjusted P value | significant |
|------------------|--------------|------------------|-----------|--------|-------|----------------------|-------------|
| CER(d18:1/22:0)  | 17           | 8                | 1.535     | 11.085 | 0.153 | 0.153                | ns          |
| CER(d18:1/24:0)  | 17           | 8                | 2.492     | 13.147 | 0.027 | 0.051                | ns          |
| CER(d18:1/26:0)  | 17           | 8                | 3.755     | 15.18  | 0.002 | 0.011                | *           |
| S1P              | 17           | 8                | -2.742    | 14.124 | 0.016 | 0.047                | *           |
| SPH              | 17           | 8                | -2.430    | 10.757 | 0.034 | 0.051                | ns          |
| Total CER(d18:1) | 17           | 8                | 2.1291    | 11.937 | 0.055 | 0.066                | ns          |

\*, FDR-adjusted P value < 0.05; ns, not significant.

**Supplementary Table 16: Univariable Analysis of Plasma Sphingolipids and Clinical Variables: Original and FDR-Adjusted P Values**

| <b>Plasma Sphingolipids/<br/>Clinical Variables</b> | <b>P value</b>  | <b>FDR-Adjusted P<br/>Values</b> |
|-----------------------------------------------------|-----------------|----------------------------------|
| SPH                                                 | 0.336           | 0.607                            |
| <b>S1P</b>                                          | <b>8.61E-07</b> | <b>3.70E-05</b>                  |
| CER(d18:1/16:0)                                     | 0.118           | 0.461                            |
| CER(d18:1/18:0)                                     | 0.052           | 0.279                            |
| CER(d18:1/20:0)                                     | 0.024           | 0.206                            |
| CER(d18:1/22:0)                                     | 0.062           | 0.296                            |
| CER(d18:1/24:0)                                     | 0.339           | 0.607                            |
| CER(d18:1/26:0)                                     | 0.524           | 0.669                            |
| CER(d18:1/18:1)                                     | 0.265           | 0.607                            |
| CER(d18:1/20:1)                                     | 0.385           | 0.637                            |
| CER(d18:1/22:1)                                     | 0.311           | 0.607                            |
| CER(d18:1/24:1)                                     | 0.029           | 0.208                            |
| CER(d18:1/26:1)                                     | 0.108           | 0.461                            |
| Total CERs(d18:1)                                   | 0.144           | 0.516                            |
| Age(years)                                          | 0.597           | 0.713                            |
| Gender                                              | 0.192           | 0.516                            |
| HbsAg                                               | 0.506           | 0.669                            |
| AFP(ng/ml)                                          | 0.009           | 0.129                            |
| Max Tumor size(cm)                                  | 0.384           | 0.637                            |
| Child Pugh grade                                    | 0.008           | 0.129                            |
| BCLC stage                                          | 0.465           | 0.669                            |
| Lesions with prior intervention                     | 0.841           | 0.865                            |
| ALBI score                                          | 0.525           | 0.669                            |
| Prior targeted /immuno-therapy                      | 0.297           | 0.607                            |
| ALT(U/L)                                            | 0.409           | 0.651                            |
| AST(U/L)                                            | 0.627           | 0.729                            |
| TBIL( $\mu$ mol/L)                                  | 0.024           | 0.206                            |
| ALB(g/L)                                            | 0.297           | 0.607                            |
| ALP(U/L)                                            | 0.037           | 0.227                            |
| WBC( $\times 10^9$ )                                | 0.179           | 0.516                            |
| LYM( $\times 10^9$ )                                | 0.548           | 0.673                            |
| NEU( $\times 10^9$ )                                | 0.490           | 0.669                            |
| MONO( $\times 10^9$ )                               | 0.191           | 0.516                            |
| HB(g/L)                                             | 0.529           | 0.669                            |
| PLT( $\times 10^9$ )                                | 0.239           | 0.605                            |
| Radiation Target Sites                              | 0.682           | 0.772                            |

|                          |       |       |
|--------------------------|-------|-------|
| BED(Gy)                  | 0.845 | 0.865 |
| Fractionation Schedule   | 0.301 | 0.607 |
| Hypertension             | 0.171 | 0.516 |
| Diabetes mellitus        | 0.522 | 0.669 |
| BMI (kg/m <sup>2</sup> ) | 0.935 | 0.935 |
| PIV                      | 0.781 | 0.840 |
| SII                      | 0.732 | 0.807 |

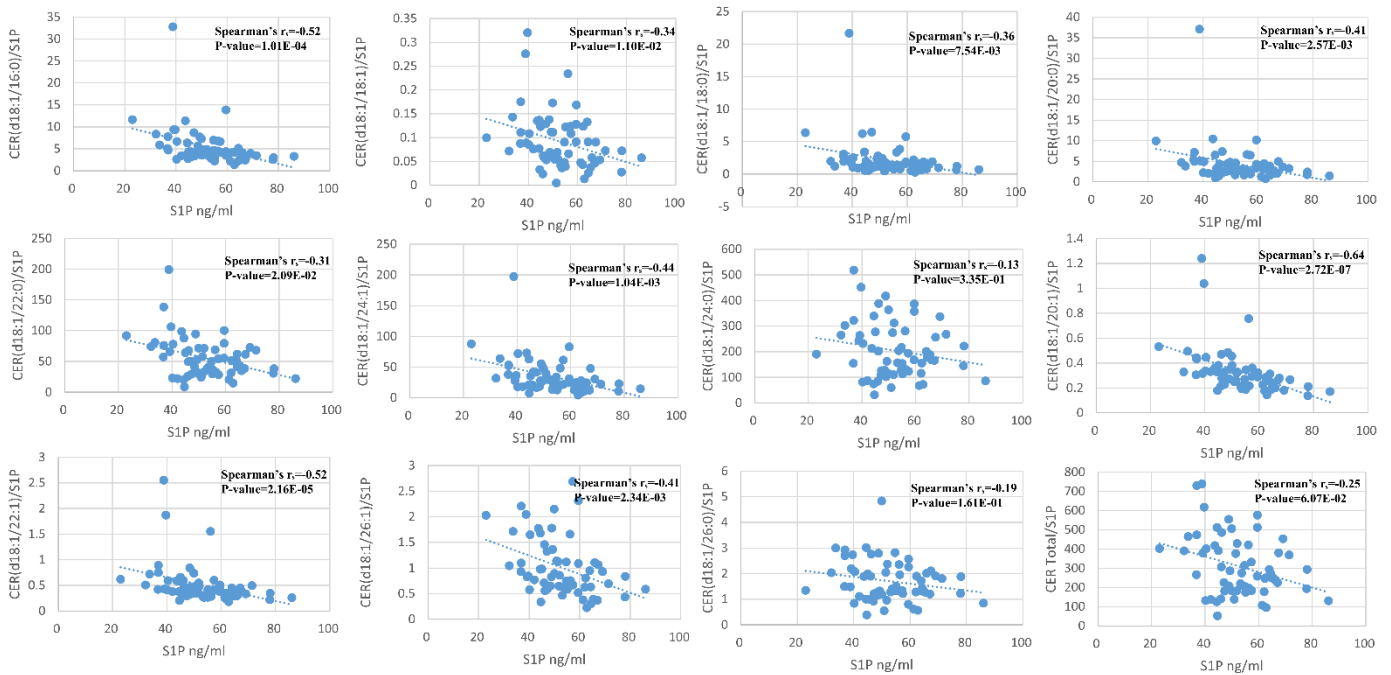

**Supplementary Figure 1: Scatter plots of plasma sphingosine-1-phosphate levels versus individual ceramide-to-S1P ratios.**

Each panel displays the relationship between plasma S1P concentration (ng/ml) and the ratio of a specific ceramide (CER) species to S1P. Spearman's rank correlation coefficient ( $r_s$ ) is calculated and displayed for each pair.

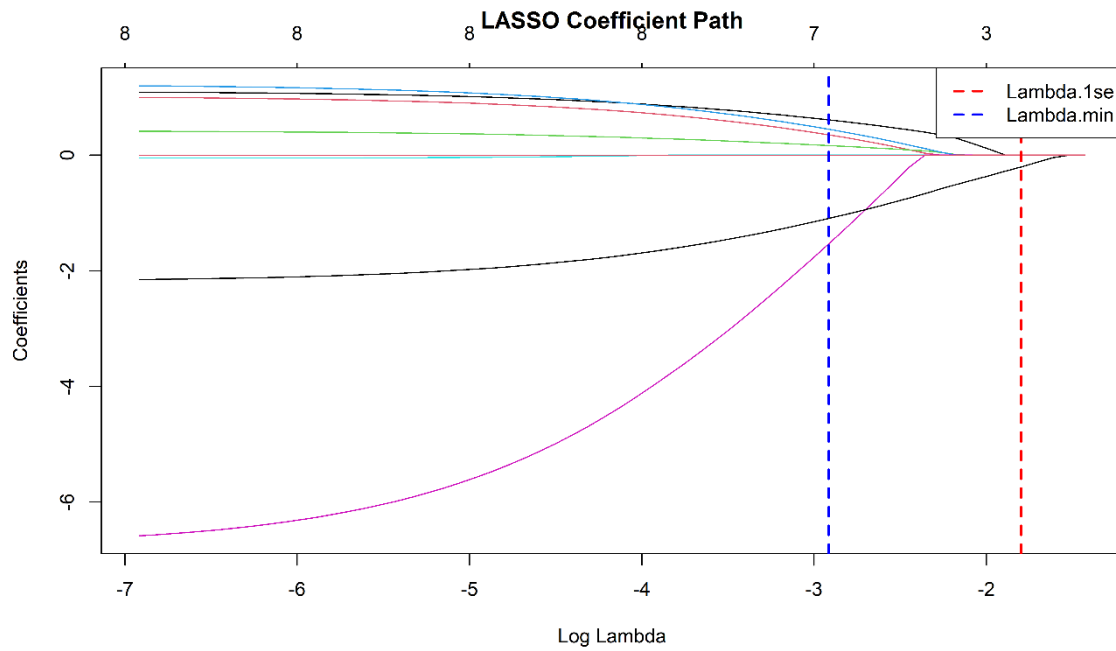

**Supplementary Figure 2: Coefficient paths from LASSO regression analysis for variable selection, with cross-validation criteria.**

The plot illustrates the change in coefficient magnitude (y-axis) for all candidate sphingolipid ratio variables across a range of the penalty parameter (Lambda) values (x-axis, log scale). Two vertical dashed lines are displayed: one positioned at the  $\lambda$  value that gives the minimum mean cross-validated error (Lambda.min), and another at the largest  $\lambda$  value within one standard error of the minimum (Lambda.1se).
